# Supplementary material for: Fragment screening libraries for the identification of protein hot spots and their minimal binding pharmacophores
Source: Royal Society of Chemistry journal article supplement (doi:10.1039/d2md00253a), 2022-11-29
Supplement: d2md00253a1.pdf [file d2md00253a1.pdf]

Fragment screening libraries for the identification of protein hot spots and their minimal binding pharmacophores

Rebecca L. Whitehouse<sup>1,2</sup>, Wesam S. Alwan<sup>1,3</sup>, Olga V. Ilyichova<sup>1,4,5</sup>, Ashley J. Taylor<sup>1</sup>, Indu R. Chandrashekar<sup>1,5,6</sup>, Biswaranjan Mohanty<sup>1,7</sup>, Bradley C. Doak\*<sup>1,5,6</sup> and Martin J. Scanlon\*<sup>1,5,6</sup>.

<sup>1</sup> Medicinal Chemistry, Monash Institute of Pharmaceutical Sciences, Monash University, Parkville, VIC 3052, Australia.

<sup>2</sup> Current address: Cell Biology, Blavatnik Institute, Harvard Medical School, Boston, MA 02115, United States of America.

<sup>3</sup> Current address: Agilent Technologies, Mulgrave, VIC 3170, Australia.

<sup>4</sup> Australian Synchrotron, ANSTO, Clayton, VIC 3168, Australia.

<sup>5</sup> ARC Training Centre for Fragment Based Design, Monash Institute of Pharmaceutical Sciences, Monash University, Parkville, VIC 3052, Australia.

<sup>6</sup> Monash Fragment Platform, Monash Institute of Pharmaceutical Sciences, Monash University, Parkville, VIC 3052, Australia.

<sup>7</sup> Current address: Sydney Analytical Core Research Facility, The University of Sydney, Sydney, NSW 2006, Australia.

## Supporting information

|                                                                        |    |
|------------------------------------------------------------------------|----|
| SMILES strings used in FTMAP .....                                     | 2  |
| SMILES strings and structures of organic solvent screen library .....  | 3  |
| SMILES strings and structures of MicroFrag library.....                | 4  |
| MicroFrag library design .....                                         | 8  |
| Crystallisation and soaking conditions .....                           | 9  |
| Data collection and processing of the dataset .....                    | 9  |
| Refinement and analysis statistics.....                                | 11 |
| Statistical significance of library properties.....                    | 15 |
| Supplementary Figure 1: FTMAP clusters.....                            | 17 |
| Supplementary Figure 2: HSQC spectral data.....                        | 18 |
| Supplementary Figure 3: Binding isotherms .....                        | 19 |
| Supplementary Figure 4: Electrostatic potential of <i>EcDsbA</i> ..... | 20 |
| Supplementary Figure 5: Comparison of MicroFrag hit properties.....    | 21 |
| Supplementary Figure 6: Structures of validated hit fragments .....    | 22 |
| References .....                                                       | 23 |

**SMILES strings used in FTMAP**

| <b>Probe</b>                              | <b>SMILES</b>               |
|-------------------------------------------|-----------------------------|
| <b>Acetaldehyde</b>                       | <chem>CC=O</chem>           |
| <b>Acetamide</b>                          | <chem>CC(N)=O</chem>        |
| <b>Acetone</b>                            | <chem>CC(C)=O</chem>        |
| <b>Acetonitrile</b>                       | <chem>CC#N</chem>           |
| <b>Benzaldehyde</b>                       | <chem>O=CC1=CC=CC=C1</chem> |
| <b>Benzene</b>                            | <chem>C1=CC=CC=C1</chem>    |
| <b>Cyclohexane</b>                        | <chem>C1CCCCC1</chem>       |
| <b>Dimethyl ether</b>                     | <chem>COC</chem>            |
| <b>Ethane</b>                             | <chem>CC</chem>             |
| <b>Ethanol (EtOH)</b>                     | <chem>CCO</chem>            |
| <b>Isobutanol</b>                         | <chem>CC(C)CO</chem>        |
| <b>Isopropanol (IPA)</b>                  | <chem>CC(O)C</chem>         |
| <b>Methylamine</b>                        | <chem>NC</chem>             |
| <b><i>N,N</i>-dimethylformamide (DMF)</b> | <chem>O=CN(C)C</chem>       |
| <b>Phenol</b>                             | <chem>OC1=CC=CC=C1</chem>   |
| <b>Urea</b>                               | <chem>NC(N)=O</chem>        |

## SMILES strings and structures of organic solvent screen library

| Solvent                             | SMILES        |
|-------------------------------------|---------------|
| Acetonitrile                        | CC#N          |
| Tetrahydrofuran (THF)               | C1CCCO1       |
| <i>N,N</i> -dimethylformamide (DMF) | O=CN(C)C      |
| Dimethyl sulfoxide (DMSO)           | O=S(C)C       |
| Methanol (MeOH)                     | CO            |
| Ethanol (EtOH)                      | CCO           |
| Isopropanol (IPA)                   | CC(O)C        |
| Acetone                             | CC(C)=O       |
| Benzyl alcohol                      | OCC1=CC=CC=C1 |
| Ethylene glycol                     | OCCO          |
| Glycerol                            | OCC(CO)O      |
| <i>N,N</i> -dimethylacetamide       | CC(N(C)C)=O   |
| Ethyl acetate (EtOAc)               | O=C(OCC)C     |
| Acetic acid                         | CC(O)=O       |
| Urea                                | NC(N)=O       |

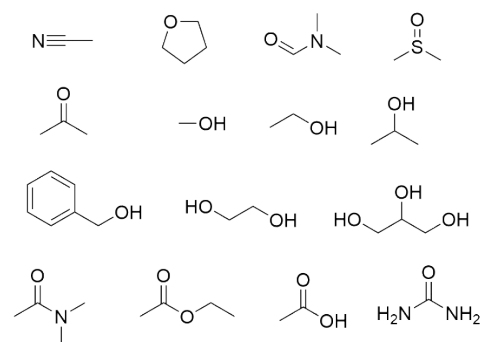

**SMILES strings and structures of MicroFrag library**

| Compound number | SMILES                        |
|-----------------|-------------------------------|
| MF1             | <chem>OC(=O)C1=NNC=C1</chem>  |
| MF2             | <chem>CN1C=CN=N1</chem>       |
| MF3             | <chem>NCCN1CCCC1</chem>       |
| MF4             | <chem>C1=NC=NC=N1</chem>      |
| MF5             | <chem>CN1CCN(C)CC1</chem>     |
| MF6             | <chem>N1C=CC=N1</chem>        |
| MF7             | <chem>OC1CCOC1</chem>         |
| MF8             | <chem>N#CC1=CSC=N1</chem>     |
| MF9             | <chem>Cl.NCCN1C=CN=C1</chem>  |
| MF10            | <chem>CN1C(=O)CCC1=O</chem>   |
| MF11            | <chem>CN1C=NC=N1</chem>       |
| MF12            | <chem>OC1=CC(Br)=CC=C1</chem> |
| MF13            | <chem>CN1N=CC=C1N</chem>      |
| MF14            | <chem>C1=CN=CN=C1</chem>      |
| MF15            | <chem>O=C1COCCN1</chem>       |
| MF16            | <chem>CC1=NNN=N1</chem>       |
| MF17            | <chem>BrC1=CNN=C1</chem>      |
| MF18            | <chem>CN1CCCCC1</chem>        |
| MF19            | <chem>NC1CCNCC1</chem>        |
| MF20            | <chem>Cl.NC1=NCCCN1</chem>    |
| MF21            | <chem>NC1=NC=CN1</chem>       |
| MF22            | <chem>OC(=O)C1=CN=CS1</chem>  |
| MF23            | <chem>OCCN1C=CC=N1</chem>     |
| MF24            | <chem>CN1CCC(O)C1</chem>      |
| MF25            | <chem>OC1=CN=CN=C1</chem>     |
| MF26            | <chem>O=C1NNC=C1</chem>       |
| MF27            | <chem>ClC1=NNC=C1</chem>      |
| MF28            | <chem>NC1=CC=C(Br)C=C1</chem> |
| MF29            | <chem>C1=CN=CC=N1</chem>      |
| MF30            | <chem>CN1C=CC=N1</chem>       |
| MF31            | <chem>CC1=CC=CN=C1</chem>     |
| MF32            | <chem>C1CCNC1</chem>          |
| MF33            | <chem>N#CC1=COC=C1</chem>     |
| MF34            | <chem>CN1N=CC=C1CN</chem>     |
| MF35            | <chem>NC(=O)C1CCCO1</chem>    |

| Compound number | SMILES                           |
|-----------------|----------------------------------|
| MF36            | <chem>CN1C=NN=N1</chem>          |
| MF37            | <chem>CN1C=CC(CN)=N1</chem>      |
| MF38            | <chem>CC1=CNC=C1</chem>          |
| MF39            | <chem>OCC1=COC=C1</chem>         |
| MF40            | <chem>Cl.CC1CCCN1</chem>         |
| MF41            | <chem>Cl.OC(=O)C1CCNC1</chem>    |
| MF42            | <chem>Cl.Cl.CN1CCC(N)C1</chem>   |
| MF43            | <chem>Cl.Cl.NC1CCCNC1</chem>     |
| MF44            | <chem>OC1=CC=CN=C1</chem>        |
| MF45            | <chem>Cl.Cl.NC[C@H]1CCCN1</chem> |
| MF46            | <chem>NC1=CC=NC(N)=N1</chem>     |
| MF47            | <chem>OC(=O)C1CCCN1</chem>       |
| MF48            | <chem>O=C1CCCN1</chem>           |
| MF49            | <chem>Cl.C1CNOC1</chem>          |
| MF50            | <chem>O=C1NCCCN1</chem>          |
| MF51            | <chem>OC(=O)C1=CNC=C1</chem>     |
| MF52            | <chem>NC1=CC=NC=N1</chem>        |
| MF53            | <chem>O=C1NC=NC=C1</chem>        |
| MF54            | <chem>NC1=NOC=C1</chem>          |
| MF55            | <chem>NC1=CC=NN1</chem>          |
| MF56            | <chem>NC1=CN=CN=C1</chem>        |
| MF57            | <chem>OC1CCNCC1</chem>           |
| MF58            | <chem>N1C=CN=C1</chem>           |
| MF59            | <chem>COC1=CC=CC=C1</chem>       |
| MF60            | <chem>BrC1=NC=CC=C1</chem>       |
| MF61            | <chem>C1CNCCN1</chem>            |
| MF62            | <chem>OCC1=CC=CC=C1</chem>       |
| MF63            | <chem>OC1CCCCC1</chem>           |
| MF64            | <chem>OCC1CCCO1</chem>           |
| MF65            | <chem>C1COCCN1</chem>            |
| MF66            | <chem>O=C1CCC(=O)N1</chem>       |
| MF67            | <chem>N1C=CN=N1</chem>           |
| MF68            | <chem>NC1=NC=CC=N1</chem>        |
| MF69            | <chem>NC1=NC=CC=C1</chem>        |
| MF70            | <chem>OC1=NC=CC=C1</chem>        |

| <b>Compound number</b> | <b>SMILES</b>                |
|------------------------|------------------------------|
| <b>MF71</b>            | <chem>CC1=NC=CC=C1</chem>    |
| <b>MF72</b>            | <chem>OC1CCCC1</chem>        |
| <b>MF73</b>            | <chem>C1CCNCC1</chem>        |
| <b>MF74</b>            | <chem>CNC1=CC=CC=C1</chem>   |
| <b>MF75</b>            | <chem>N1C=NC=N1</chem>       |
| <b>MF76</b>            | <chem>CC1CCNCC1</chem>       |
| <b>MF77</b>            | <chem>CN1CCNCC1</chem>       |
| <b>MF78</b>            | <chem>CCN1CCNCC1</chem>      |
| <b>MF79</b>            | <chem>CN1C=CN=C1</chem>      |
| <b>MF80</b>            | <chem>NC1=CC=CC=C1</chem>    |
| <b>MF81</b>            | <chem>CN1CCCC1=O</chem>      |
| <b>MF82</b>            | <chem>CN1CCOCC1</chem>       |
| <b>MF83</b>            | <chem>OC1=CC=CC=C1</chem>    |
| <b>MF84</b>            | <chem>C1CCOC1</chem>         |
| <b>MF85</b>            | <chem>NCC1=CC=CC=C1</chem>   |
| <b>MF86</b>            | <chem>C1COCCO1</chem>        |
| <b>MF87</b>            | <chem>C1=CC=NC=C1</chem>     |
| <b>MF88</b>            | <chem>NC1CCOC1</chem>        |
| <b>MF89</b>            | <chem>CC1=CC=CC(N)=C1</chem> |
| <b>MF90</b>            | <chem>N1C=CC=C1</chem>       |
| <b>MF91</b>            | <chem>CN1C=C(N)C=N1</chem>   |

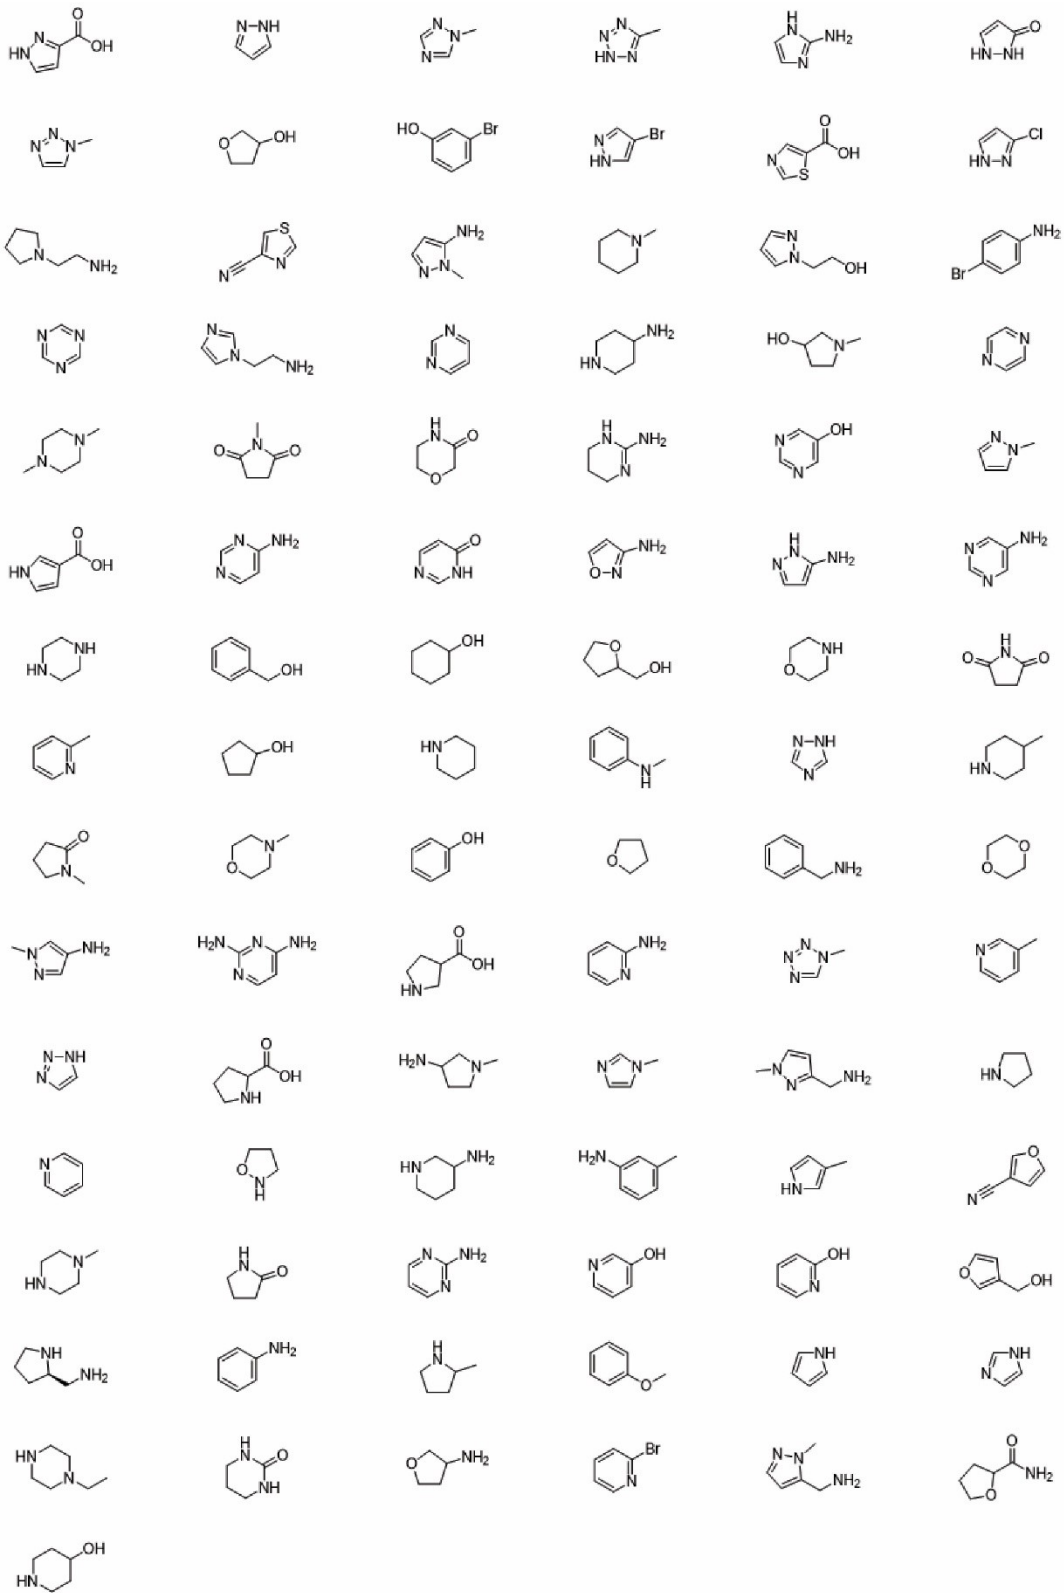

## MicroFrag library design

All analysis and design was conducted using KNIME Analytic Platform version 4.0.2<sup>1</sup> with nodes developed by KNIME Analytic Platform, RDKit, CDK toolkits, R, Vernalis and Indigo (EPAM Systems). All theoretical topologies were manually created for compounds containing 5-8 heavy atoms and one 5- or 6-membered ring. Topologies were defined as the theoretically connected scaffold graphs of nodes and connecting edges without bond order or atom type.

The PDB analysis was conducted using the dataset of all ligands accessed in November 2018<sup>2,3</sup>, where the following filters were applied: 5 – 8 heavy atoms, SlogP < 2, at least one heteroatom, at least one ring, and a custom list of ≥ 3 undesirable structural alerts<sup>4</sup>, ≥1 reactive functional groups or ≥1 PAINS.<sup>5</sup> <sup>6</sup> A score of 1 or 0 was given if the fragments were found in the PDB or not.

The DrugBank analysis was conducted using the dataset accessed in November 2018<sup>7</sup> where the following filters were applied: FDA approved status, oral route of administration, and SlogP between -2 and 6. The remaining 1054 drugs were fragmented into 5250 5 and 8 heavy atom fragments, radicals were converted to hydrogens and aromaticity was resolved using the RDKit normalisation node. Fragments with ≥ 3 undesirable alerts, ≥1 reactive functional groups or ≥1 PAINS were removed as well as any compound that did not contain at least one heteroatom. A normalised frequency of fragment occurrence within the oral drug bank set was then calculated with sd = 1, av = 0.

The MicroFrag library was designed from reagents that were commercially available within the MolPort building blocks reagent list accessed in November 2018. The reagent list was filtered for compounds which contained between 5 – 8 heavy atoms, SlogP < 2, one 5- or 6-membered ring, and removed isotopically enriched compounds.

All commercially available compounds fitting the criteria were analysed by calculation of physicochemical properties (RDKit Descriptors node) number of 2D 2-point pharmacophores (from a list of 95 in-house SMARTS substructural 2-point pharmacophore motifs). A scoring function (MicroFrag score) for desired physicochemical properties, presence of Cl, Br or I halogens, complexity and appearance in the PDB dataset or frequency in the DrugBank databases was calculated based on the following formula:

$$\begin{aligned} & (\text{abs}((2.5 - \text{NumHeteroAtoms}) * -2) + (9 - \text{NumHeavyAtoms}) * 2 + (\text{abs}(-0.65 - \text{SlogP})) * -6 + (\text{number} \\ & \text{of 2D 2-point Pharmacophores} * -0.5) + (\text{whether it was found in the PDB or} \\ & \text{DrugBank} * 1) + (\text{normalised frequency of occurrence in drugs} * 2) + (\text{contains a Cl, Br or} \\ & \text{I} * 1) + (\text{NumAromaticRings} * 2) + (\text{abs}(45 - \text{TPSA}) * -0.1) + (\text{number of alert FG matches} * -2) \end{aligned}$$

Diversity selection was conducted using an iterative selection process where a balance of normalised MicroFrag score, novel topology coverage, novel 2D 2-point pharmacophore coverage, and sphere exclusion was calculated with Tanimoto similarity of ECFP4<sup>8</sup> and 2D 2-point pharmacophore fingerprints were used to build the library. Diversity selection was calculated based on the following formula:

$$\begin{aligned} & (-1 * \text{number of novel topology or 2D 2-point pharmacophore}) * (\text{weighting of novel} \\ & \text{topology/pharmacophore}) + (-1 * \text{MicroFrag score}) * (\text{weighting of MicroFrag score}) + (\text{Tanimoto} \\ & \text{similarity to library (ECFP4)}) * (\text{weighting of Tanimoto similarity}) + (\text{Tanimoto similarity to library (2D} \\ & \text{2-point pharmacophores)}) * (\text{weighting of Tanimoto similarity}) \end{aligned}$$



Weighting of variables:

- Novel topology/pharmacophore = 0.5
- MicroFrag score = 1.2
- Tanimoto similarity to library = 1.2

Physicochemical properties, nPMI<sup>9</sup>, 2D 2-point pharmacophores, 2D 3-point pharmacophores, SMCM<sup>10</sup>, Murcko scaffolds<sup>11</sup>, topologies, and Tanimoto similarities of ECFP4, FCFP4, and MACCS fingerprints<sup>8, 12</sup> were used to analyse and compare the resultant commercially available, PDB, DrugBank and MicroFrag compound lists.

## Crystallisation and soaking conditions

### Organic solvent library

Compound-*EcDsbA* complexes were prepared by crystal soaking. *EcDsbA* was crystallised using hanging drop vapour diffusion. 1  $\mu$ L of 30 mg/mL protein was mixed with an equal volume of crystallisation buffer (11 – 13 % PEG8000, 5 – 6.5 % glycerol, 1 mM CuCl<sub>2</sub>, 100 mM sodium cacodylate pH 6.1) and equilibrated against 0.5 mL of reservoir buffer at 20 °C. Pre-grown *EcDsbA* crystals were dehydrated and transferred into 2  $\mu$ L drops of 50 or 80 % organic solvent diluted in 13 % PEG8000, 6.5 % glycerol, 1 mM CuCl<sub>2</sub>, 100 mM sodium cacodylate pH 6.1 for 0.5- 5 mins. Crystals were mounted on cryo loops and flash-cooled in liquid nitrogen.

### MicroFrag library

Compound-*EcDsbA* complexes were prepared by crystal soaking. *EcDsbA* was crystallised using hanging drop vapour diffusion. 1  $\mu$ L of 30 mg/mL protein was mixed with an equal volume of crystallisation buffer (11 – 13 % PEG8000, 5 – 6.5 % glycerol, 1 mM CuCl<sub>2</sub>, 100 mM sodium cacodylate pH 6.1) and equilibrated against 0.5 mL of reservoir buffer at 20 °C. Crystals were transferred into 2  $\mu$ L drops of 13 % PEG8000, 6.5 % glycerol, 1 mM CuCl<sub>2</sub>, 100 mM sodium cacodylate pH 6.1, 9 % MeOH and the MicroFrag at 1 M and incubated for 0.5-5 minutes. Crystals were mounted on cryo loops and flash-cooled in liquid nitrogen. If the addition of a MicroFrag compound caused cracking or dissolution of the crystal, the final concentration was adjusted to 0.5 M, adjusted to the pH range 4-9, and the soaking experiment was rerun.

## Data collection and processing of the dataset

Datasets were collected at the Australian Synchrotron, part of ANSTO, on MX1 and MX2 beamlines and made use of the Australian Cancer Research Foundation (ACRF) detector<sup>13</sup>. The MX1 beamline was equipped with an ADSC Quantum 210r detector and MX2 with an EIGER X 16M pixel detector (Dectris Ltd). Data were processed using the automated data processing pipeline implemented at the beamline, where data were indexed, integrated and scaled with xdsme<sup>14</sup> and AIMLESS<sup>15</sup>. The resulting data collection statistics for each dataset were reviewed and, if necessary, reprocessed with XDS<sup>16</sup> or IMOSFLM<sup>17</sup> and AIMLESS<sup>15, 18</sup>. For all the datasets, we chose a resolution cut-off based on the following criteria in the highest resolution range met: CC<sub>1/2</sub> was at least 0.6,  $\langle I/\sigma(I) \rangle$  was greater than 1.0, and

completeness was greater than 90 %. In cases where data collection statistics did not fulfil our quality requirement or crystals diffracted to lower than 2.5 Å resolution, the crystallographic experiment was repeated.

All datasets were phased by molecular replacement (MR) with Phaser<sup>19</sup> using chain A of apo-*EcDsbA* structure (PDB:1FVK<sup>20</sup>) as a search model. MR and automated refinement steps were carried out using the automated MR pipeline implemented in Auto-Rickshaw<sup>21, 22</sup>. Briefly, MR was performed using the MOLREP<sup>23</sup> automated refinement protocol. This involved initial refinement in CNS<sup>24</sup> followed by refinement in REFMAC5<sup>25</sup>. In the CNS rigid body refinement, B-factor (INDIVIDUAL refinement) and positional refinement were undertaken. The resulting model was used in REFMAC5, to perform a maximum likelihood refinement including B-factor refinement.

The final structure was obtained after several rounds of manual refinement using Coot<sup>26</sup> and refinement in phenix.refine<sup>27, 28</sup>. Ligand restraints were generated in phenix.eLBOW<sup>29</sup> or Grade web server<sup>30</sup> and refinement statistics were prepared with “Generate “Table 1” for journal” utility within PHENIX version 1.19.4092<sup>28</sup>.

## Refinement and analysis statistics

|                                       | Urea - 8DG0                             | DMSO-1 - 8DG1                           | DMSO-2 - 8DG2                           |
|---------------------------------------|-----------------------------------------|-----------------------------------------|-----------------------------------------|
| <b>Wavelength</b>                     | 0.9537                                  | 0.95372                                 | 0.93572                                 |
| <b>Resolution range</b>               | 37.54 - 2.5 (2.589 - 2.5)               | 47.86 - 1.95 (2.02 - 1.95)              | 37.18 - 1.95 (2.02 - 1.95)              |
| <b>Space group</b>                    | C 1 2 1                                 | C 1 2 1                                 | C 1 2 1                                 |
| <b>Unit cell</b>                      | 116.341 64.324<br>75.3464 90 125.318 90 | 117.214 63.205<br>74.8476 90 125.254 90 | 117.246 63.095<br>74.5471 90 125.253 90 |
| <b>Total reflections</b>              | 31741 (3130)                            | 65422 (6554)                            | 65016 (6416)                            |
| <b>Unique reflections</b>             | 17916 (1565)                            | 32730 (2296)                            | 32516 (2243)                            |
| <b>Multiplicity</b>                   | 7.0 (6.8)                               | 7.0 (6.8)                               | 6.9 (6.7)                               |
| <b>Completeness (%)</b>               | 99.87 (99.94)                           | 99.96 (99.88)                           | 99.88 (99.66)                           |
| <b>Mean I/sigma(I)</b>                | 13.6 (2.57)                             | 15.2 (2.0)                              | 9.4 (1.5)                               |
| <b>Wilson B-factor</b>                | 47.12                                   | 35.1                                    | 33.16                                   |
| <b>R-merge</b>                        | 0.03076 (0.3038)                        | 0.063 (1.1183)                          | 0.096 (1.243)                           |
| <b>R-meas</b>                         | 0.0435 (0.4296)                         | 0.069 (1.304)                           | 0.103 (1.346)                           |
| <b>R-pim</b>                          | 0.03076 (0.3038)                        | 0.036 (0.693)                           | 0.039 (0.512)                           |
| <b>CC1/2</b>                          | 0.999 (0.805)                           | 0.999 (0.805)                           | 0.998 (0.817)                           |
| <b>CC*</b>                            | 1 (0.944)                               | 1 (0.944)                               | 1 (0.948)                               |
| <b>Reflections used in refinement</b> | 15859 (1564)                            | 32719 (3274)                            | 32480 (3199)                            |
| <b>Reflections used for R-free</b>    | 807 (60)                                | 1739 (167)                              | 1728 (164)                              |
| <b>R-work</b>                         | 0.2015 (0.2959)                         | 0.1898 (0.2591)                         | 0.1882 (0.2521)                         |
| <b>R-free</b>                         | 0.2569 (0.4225)                         | 0.2211 (0.3010)                         | 0.2213 (0.2730)                         |
| <b>CC(work)</b>                       | 0.968 (0.788)                           | 0.959 (0.858)                           | 0.959 (0.887)                           |
| <b>CC(free)</b>                       | 0.943 (0.510)                           | 0.958 (0.794)                           | 0.954 (0.811)                           |
| <b>Number of non-hydrogen atoms</b>   | 2819                                    | 3041                                    | 3026                                    |
| <b>Macromolecules</b>                 | 2771                                    | 2880                                    | 2876                                    |
| <b>Ligands</b>                        | 22                                      | 81                                      | 63                                      |
| <b>Solvent</b>                        | 26                                      | 80                                      | 87                                      |
| <b>Protein residues</b>               | 369                                     | 375                                     | 375                                     |
| <b>RMS(bonds)</b>                     | 0.008                                   | 0.008                                   | 0.008                                   |
| <b>RMS(angles)</b>                    | 0.93                                    | 0.90                                    | 0.91                                    |
| <b>Ramachandran favored (%)</b>       | 96.99                                   | 98.65                                   | 98.38                                   |
| <b>Ramachandran</b>                   | 3.01                                    | 1.35                                    | 1.62                                    |

|                                  |       |       |       |
|----------------------------------|-------|-------|-------|
| <b>allowed (%)</b>               |       |       |       |
| <b>Ramachandran outliers (%)</b> | 0.00  | 0.00  | 0.00  |
| <b>Rotamer outliers (%)</b>      | 1.79  | 1.70  | 1.02  |
| <b>Clashscore</b>                | 5.01  | 3.67  | 6.52  |
| <b>Average B-factor</b>          | 55.44 | 44.15 | 41.14 |
| <b>Macromolecules</b>            | 55.55 | 43.69 | 40.68 |
| <b>Ligands</b>                   | 55.60 | 59.75 | 58.12 |
| <b>Solvent</b>                   | 44.02 | 44.69 | 43.76 |
| <b>Number of TLS groups</b>      | 12    | 9     | 14    |

|                                       | <b>MFP10474_E3 - 8CZN</b>             | <b>MFP6710_B5 - 8CZM</b>             | <b>MFP10475_E11 - 8CXE</b>             |
|---------------------------------------|---------------------------------------|--------------------------------------|----------------------------------------|
| <b>Wavelength</b>                     | 0.95365                               | 0.95365                              | 0.95365                                |
| <b>Resolution range</b>               | 31.59 - 1.7 (1.761 - 1.7)             | 37.41 - 1.8 (1.864 - 1.8)            | 49.00 - 1.47 (1.523 - 1.47)            |
| <b>Space group</b>                    | C 1 2 1                               | C 1 2 1                              | C 1 2 1                                |
| <b>Unit cell</b>                      | 118.439 63.19 75.668<br>90 124.021 90 | 116.956 64.9 75.009 90<br>125.676 90 | 115.825 64.822 75.075<br>90 125.752 90 |
| <b>Total reflections</b>              | 101618 (10199)                        | 83850 (8290)                         | 152390 (14589)                         |
| <b>Unique reflections</b>             | 62171 (5112)                          | 45518 (4149)                         | 76352 (3452)                           |
| <b>Multiplicity</b>                   | 6.7 (5.9)                             | 7.0 (6.3)                            | 6.9 (6.7)                              |
| <b>Completeness (%)</b>               | 99.88 (99.98)                         | 99.24 (98.71)                        | 99.44 (90.5)                           |
| <b>Mean I/sigma(I)</b>                | 10.6 (1.79)                           | 13.5 (1.40)                          | 15.8 (1.5)                             |
| <b>Wilson B-factor</b>                | 22.88                                 | 30.79                                | 18.76                                  |
| <b>R-merge</b>                        | 0.092 (0.2843)                        | 0.02021 (0.3699)                     | 0.044 (0.809)                          |
| <b>R-meas</b>                         | 0.1 (0.4021)                          | 0.02858 (0.5231)                     | 0.048 (0.876)                          |
| <b>R-pim</b>                          | 0.038 (0.2843)                        | 0.02021 (0.3699)                     | 0.018 (0.460)                          |
| <b>CC1/2</b>                          | 0.999 (0.814)                         | 1 (0.723)                            | 1 (0.799)                              |
| <b>CC*</b>                            | 1 (0.947)                             | 1 (0.916)                            | 1 (0.943)                              |
| <b>Reflections used in refinement</b> | 50994 (5111)                          | 42058 (4148)                         | 76202 (7304)                           |
| <b>Reflections used for R-free</b>    | 784 (84)                              | 962 (109)                            | 960 (80)                               |
| <b>R-work</b>                         | 0.1919 (0.2728)                       | 0.1971 (0.2977)                      | 0.1741 (0.2526)                        |
| <b>R-free</b>                         | 0.2172 (0.3120)                       | 0.2211 (0.3408)                      | 0.2032 (0.2572)                        |
| <b>CC(work)</b>                       | 0.960 (0.842)                         | 0.955 (0.816)                        | 0.966 (0.850)                          |
| <b>CC(free)</b>                       | 0.964 (0.807)                         | 0.937 (0.775)                        | 0.957 (0.840)                          |

|                                     |       |       |       |
|-------------------------------------|-------|-------|-------|
| <b>Number of non-hydrogen atoms</b> | 3292  | 3168  | 3464  |
| <b>Macromolecules</b>               | 2887  | 2873  | 2942  |
| <b>Ligands</b>                      | 41    | 56    | 50    |
| <b>Solvent</b>                      | 364   | 239   | 472   |
| <b>Protein residues</b>             | 374   | 376   | 376   |
| <b>RMS(bonds)</b>                   | 0.007 | 0.008 | 0.006 |
| <b>RMS(angles)</b>                  | 0.87  | 0.93  | 0.80  |
| <b>Ramachandran favored (%)</b>     | 98.38 | 98.66 | 98.66 |
| <b>Ramachandran allowed (%)</b>     | 1.62  | 1.34  | 1.34  |
| <b>Ramachandran outliers (%)</b>    | 0.00  | 0.00  | 0.00  |
| <b>Rotamer outliers (%)</b>         | 0.34  | 0.69  | 0.33  |
| <b>Clashscore</b>                   | 1.41  | 2.29  | 1.55  |
| <b>Average B-factor</b>             | 27.34 | 34.19 | 24.48 |
| <b>Macromolecules</b>               | 26.29 | 33.70 | 22.81 |
| <b>Ligands</b>                      | 33.96 | 43.18 | 31.57 |
| <b>Solvent</b>                      | 34.87 | 38.06 | 34.12 |
| <b>Number of TLS groups</b>         | 1     | 1     | 11    |

|                           | <b>MFP10498_F3 - 8CXD</b>              | <b>MFP2018-H8 - 8D12</b>               | <b>MFP2447_C10 - 8D10</b>             |
|---------------------------|----------------------------------------|----------------------------------------|---------------------------------------|
| <b>Wavelength</b>         | 0.95365                                | 0.95365                                | 0.95365                               |
| <b>Resolution range</b>   | 31.29 - 1.8 (1.864 - 1.8)              | 30.05 - 1.472 (1.525 - 1.472)          | 33.04 - 1.47 (1.523 - 1.47)           |
| <b>Space group</b>        | C 1 2 1                                | C 1 2 1                                | C 1 2 1                               |
| <b>Unit cell</b>          | 117.725 62.577 74.722<br>90 126.347 90 | 115.777 64.725 75.052<br>90 126.208 90 | 115.56 65.082 74.938<br>90 126.282 90 |
| <b>Total reflections</b>  | 81077 (8065)                           | 147200 (14104)                         | 151134 (14467)                        |
| <b>Unique reflections</b> | 50152 (4031)                           | 73888 (7041)                           | 75786 (3343)                          |
| <b>Multiplicity</b>       | 6.8 (5.4)                              | 7.0 (6.6)                              | 6.9 (6.3)                             |
| <b>Completeness (%)</b>   | 99.67 (99.88)                          | 97.5 (93.58)                           | 99.22 (94.73)                         |
| <b>Mean I/sigma(I)</b>    | 8.6 (1.92)                             | 12.9 (1.54)                            | 13.23 (1.13)                          |
| <b>Wilson B-factor</b>    | 24.42                                  | 20.37                                  | 22.71                                 |
| <b>R-merge</b>            | 0.02865 (0.2312)                       | 0.053 (0.2822)                         | 0.053 (1.057)                         |
| <b>R-meas</b>             | 0.04051 (0.327)                        | 0.057 (0.3992)                         | 0.053 (1.250)                         |

|                                       |                  |                 |                 |
|---------------------------------------|------------------|-----------------|-----------------|
| <b>R-pim</b>                          | 0.02865 (0.2312) | 0.031 (0.2822)  | 0.020 (0.485)   |
| <b>CC1/2</b>                          | 0.999 (0.887)    | 0.999 (0.814)   | 1 (0.662)       |
| <b>CC*</b>                            | 1 (0.97)         | 1 (0.947)       | 1 (0.892)       |
| <b>Reflections used in refinement</b> | 40541 (4031)     | 73575 (7041)    | 75518 (7189)    |
| <b>Reflections used for R-free</b>    | 770 (71)         | 962 (82)        | 759 (78)        |
| <b>R-work</b>                         | 0.1781 (0.2641)  | 0.1903 (0.2924) | 0.1852 (0.3053) |
| <b>R-free</b>                         | 0.2012 (0.3139)  | 0.2080 (0.3058) | 0.1999 (0.3098) |
| <b>CC(work)</b>                       | 0.966 (0.886)    | 0.959 (0.848)   | 0.965 (0.763)   |
| <b>CC(free)</b>                       | 0.953 (0.826)    | 0.958 (0.786)   | 0.955 (0.702)   |
| <b>Number of non-hydrogen atoms</b>   | 3223             | 3310            | 3344            |
| <b>Macromolecules</b>                 | 2919             | 2994            | 2919            |
| <b>Ligands</b>                        | 58               | 22              | 33              |
| <b>Solvent</b>                        | 246              | 294             | 392             |
| <b>Protein residues</b>               | 376              | 376             | 376             |
| <b>RMS(bonds)</b>                     | 0.007            | 0.007           | 0.008           |
| <b>RMS(angles)</b>                    | 0.78             | 0.97            | 0.88            |
| <b>Ramachandran favored (%)</b>       | 98.92            | 98.92           | 98.92           |
| <b>Ramachandran allowed (%)</b>       | 1.08             | 1.08            | 1.08            |
| <b>Ramachandran outliers (%)</b>      | 0.00             | 0.00            | 0.00            |
| <b>Rotamer outliers (%)</b>           | 0.34             | 0.65            | 0.68            |
| <b>Clashscore</b>                     | 1.57             | 3.07            | 1.75            |
| <b>Average B-factor</b>               | 28.34            | 25.51           | 29.95           |
| <b>Macromolecules</b>                 | 27.62            | 24.77           | 28.76           |
| <b>Ligands</b>                        | 39.58            | 36.94           | 41.20           |
| <b>Solvent</b>                        | 34.17            | 32.23           | 37.86           |
| <b>Number of TLS groups</b>           | 8                | 10              | 7               |

## Statistical significance of library properties

Statistical significance was calculated using Chi square test.

### Heavy atom count

|     | Expected (total library) | Observed (hits) | Percentage expected (total library) | Percentage observed (hits) | P value                |
|-----|--------------------------|-----------------|-------------------------------------|----------------------------|------------------------|
| 5-8 | 140                      | 43              | 11                                  | 59                         | $1.22 \times 10^{-51}$ |
| Out | 1109                     | 30              | 89                                  | 41                         |                        |

### Hydrogen bond acceptors

|     | Expected (total library) | Observed (hits) | Percentage expected (total library) | Percentage observed (hits) | P value               |
|-----|--------------------------|-----------------|-------------------------------------|----------------------------|-----------------------|
| 0-1 | 151                      | 23              | 12                                  | 32                         | $2.58 \times 10^{-9}$ |
| Out | 1098                     | 50              | 88                                  | 68                         |                       |

### Hydrogen bond donors

|     | Expected (total library) | Observed (hits) | Percentage expected (total library) | Percentage observed (hits) | P value |
|-----|--------------------------|-----------------|-------------------------------------|----------------------------|---------|
| 0-1 | 1041                     | 68              | 83                                  | 93                         | 0.0085  |
| Out | 208                      | 5               | 17                                  | 7                          |         |

### ClogP

|          | Expected (total library) | Observed (hits) | Percentage expected (total library) | Percentage observed (hits) | P value                |
|----------|--------------------------|-----------------|-------------------------------------|----------------------------|------------------------|
| -1 – 0.5 | 184                      | 28              | 15                                  | 38                         | $2.64 \times 10^{-11}$ |
| Out      | 1065                     | 45              | 85                                  | 62                         |                        |

### SMCM

|         | Expected (total library) | Observed (hits) | Percentage expected (total library) | Percentage observed (hits) | P value                |
|---------|--------------------------|-----------------|-------------------------------------|----------------------------|------------------------|
| 10 - 15 | 111                      | 29              | 9                                   | 40                         | $2.29 \times 10^{-27}$ |
| Out     | 1138                     | 44              | 91                                  | 60                         |                        |

**2D 2-point pharmacophores**

|     | Expected (total library) | Observed (hits) | Percentage expected (total library) | Percentage observed (hits) | P value               |
|-----|--------------------------|-----------------|-------------------------------------|----------------------------|-----------------------|
| 0-3 | 311                      | 33              | 25                                  | 45                         | $2.67 \times 10^{-6}$ |
| Out | 938                      | 40              | 75                                  | 55                         |                       |

**TPSA**

|       | Expected (total library) | Observed (hits) | Percentage expected (total library) | Percentage observed (hits) | P value               |
|-------|--------------------------|-----------------|-------------------------------------|----------------------------|-----------------------|
| 20-40 | 409                      | 37              | 33                                  | 51                         | $3.33 \times 10^{-4}$ |
| Out   | 840                      | 36              | 67                                  | 49                         |                       |



## Supplementary Figure 1: FTMAP clusters

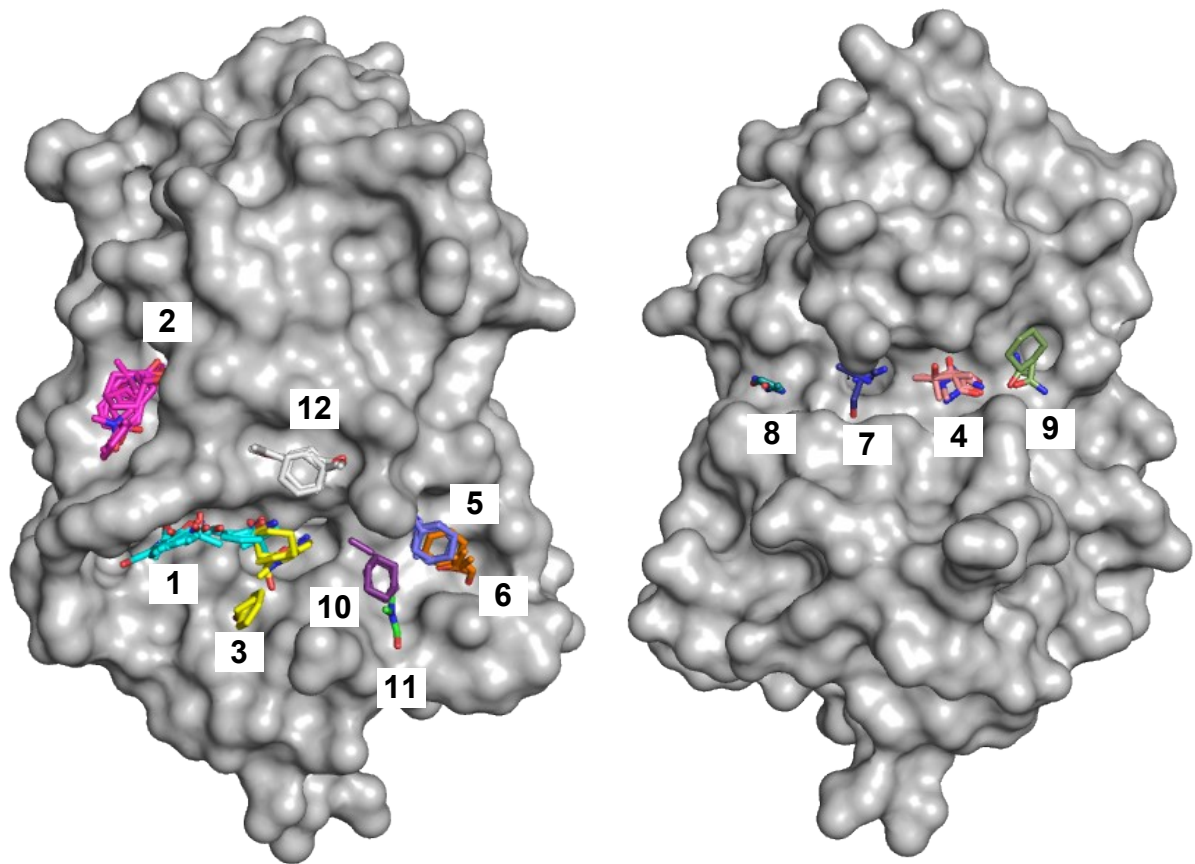

**Supplementary Figure 1: Binding hot spots determined by FTMap analysis.** Clusters are numbered in order of FTMap ranking. *EcDsbA* is shown as a grey surface (PDB ID: 1FVK<sup>31</sup>), with each cluster shown as a different colour.

## Supplementary Figure 2: HSQC spectral data

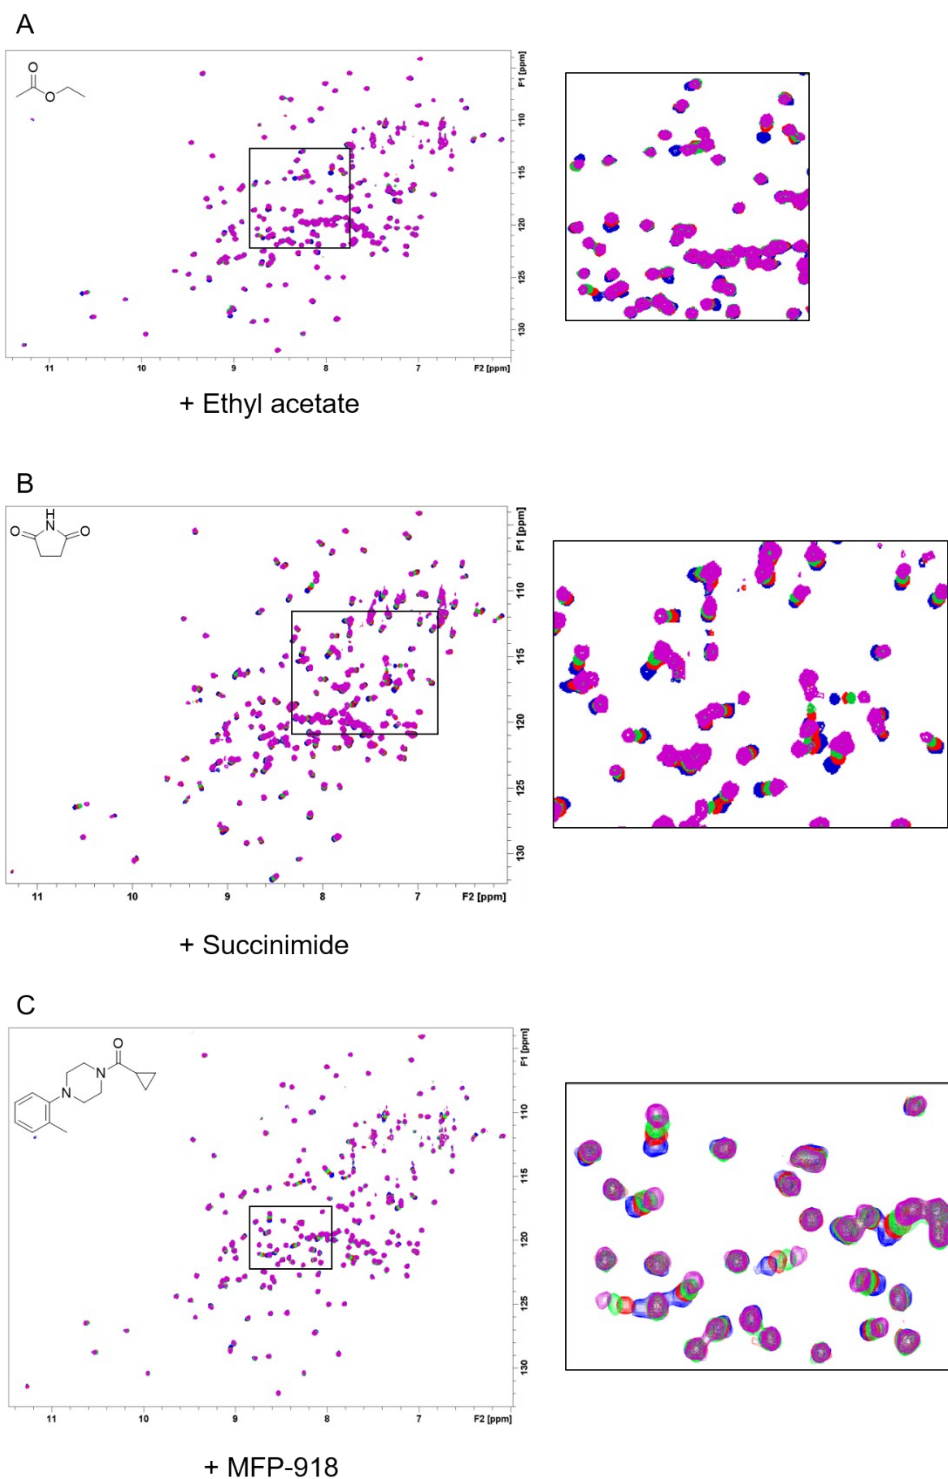

**Supplementary Figure 2: Sample  $^{15}\text{N}$ - $^1\text{H}$  HSQC NMR titration spectra.** A)  $^{15}\text{N}$ - $^1\text{H}$  HSQC spectra of oxidised  $^{15}\text{N}$  EcDsbA (100  $\mu\text{M}$ , blue) in the presence of 2 % (red), 4 % (green) and 5 % (magenta) ethyl acetate. B)  $^{15}\text{N}$ - $^1\text{H}$  HSQC spectra of oxidised  $^{15}\text{N}$  EcDsbA (100  $\mu\text{M}$ , blue), in the presence of 0.3 M (red), 0.6 M (green) and 1.5 M (magenta) succinimide and C)  $^{15}\text{N}$ - $^1\text{H}$  HSQC spectra of oxidised  $^{15}\text{N}$  EcDsbA (100  $\mu\text{M}$ , blue), in the presence of 500  $\mu\text{M}$  (red), 1000  $\mu\text{M}$  (green) and 2000  $\mu\text{M}$  (magenta) MFP-918

### Supplementary Figure 3: Binding isotherms

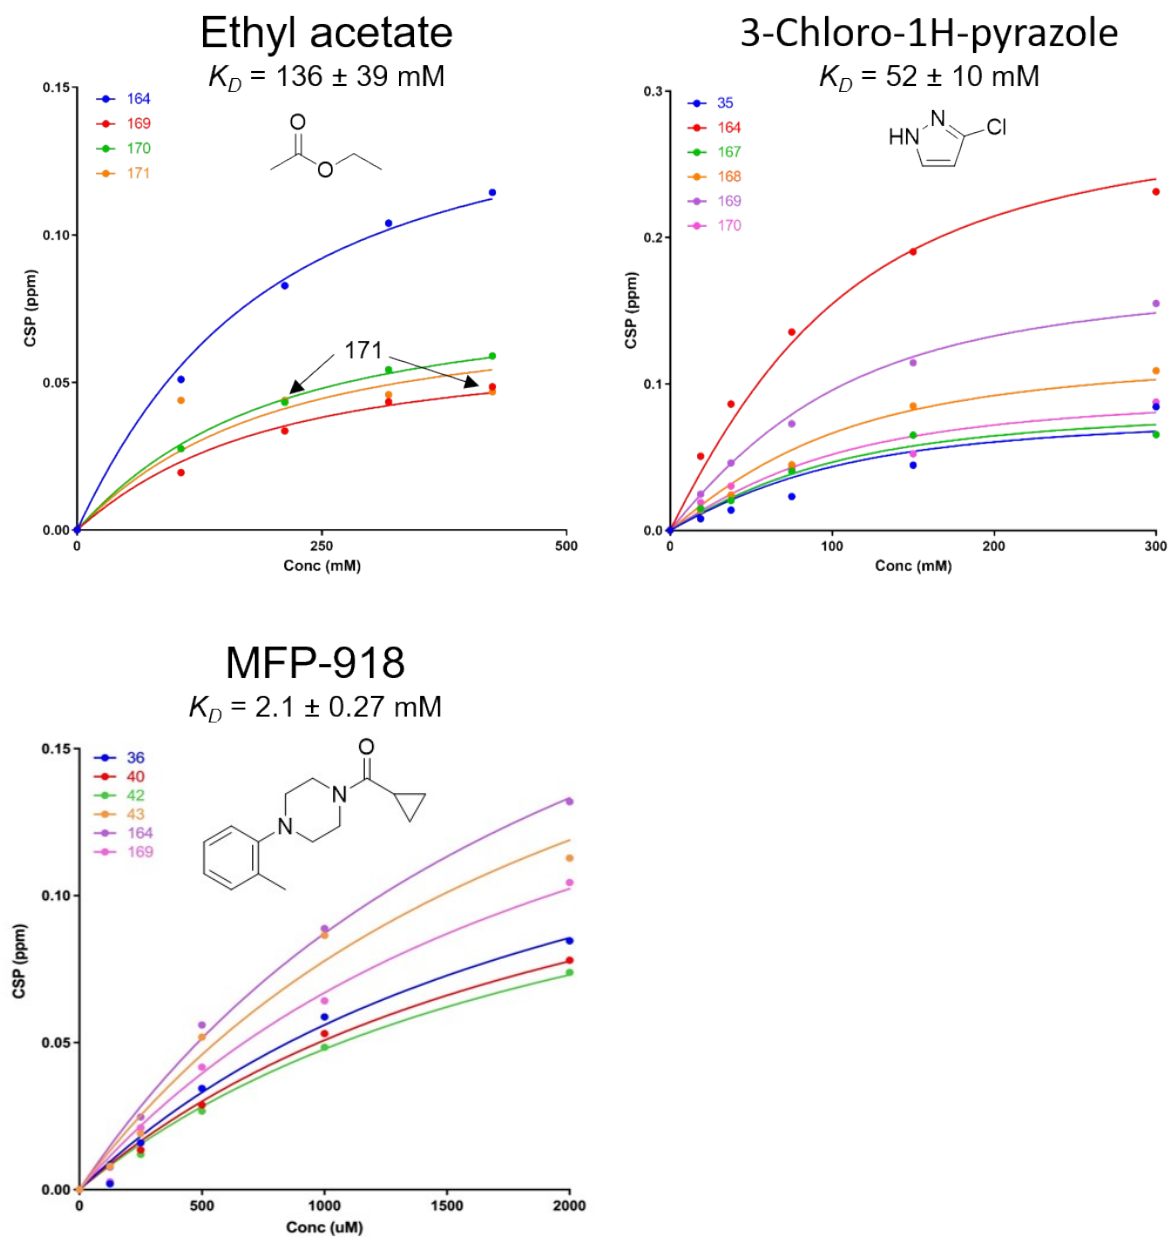

**Supplementary Figure 3: Binding affinity estimation based on CSP observed in the  $^{15}\text{N}$ - $^1\text{H}$  HSCQ NMR.** Sample affinity data were collected by testing compound titrations against uniformly  $^{15}\text{N}$  labelled oxidised *EcDsbA* by  $^{15}\text{N}$ - $^1\text{H}$  HSCQ NMR. Insets indicate the residues of *EcDsbA*.

#### Supplementary Figure 4: Electrostatic potential of *EcDsbA*

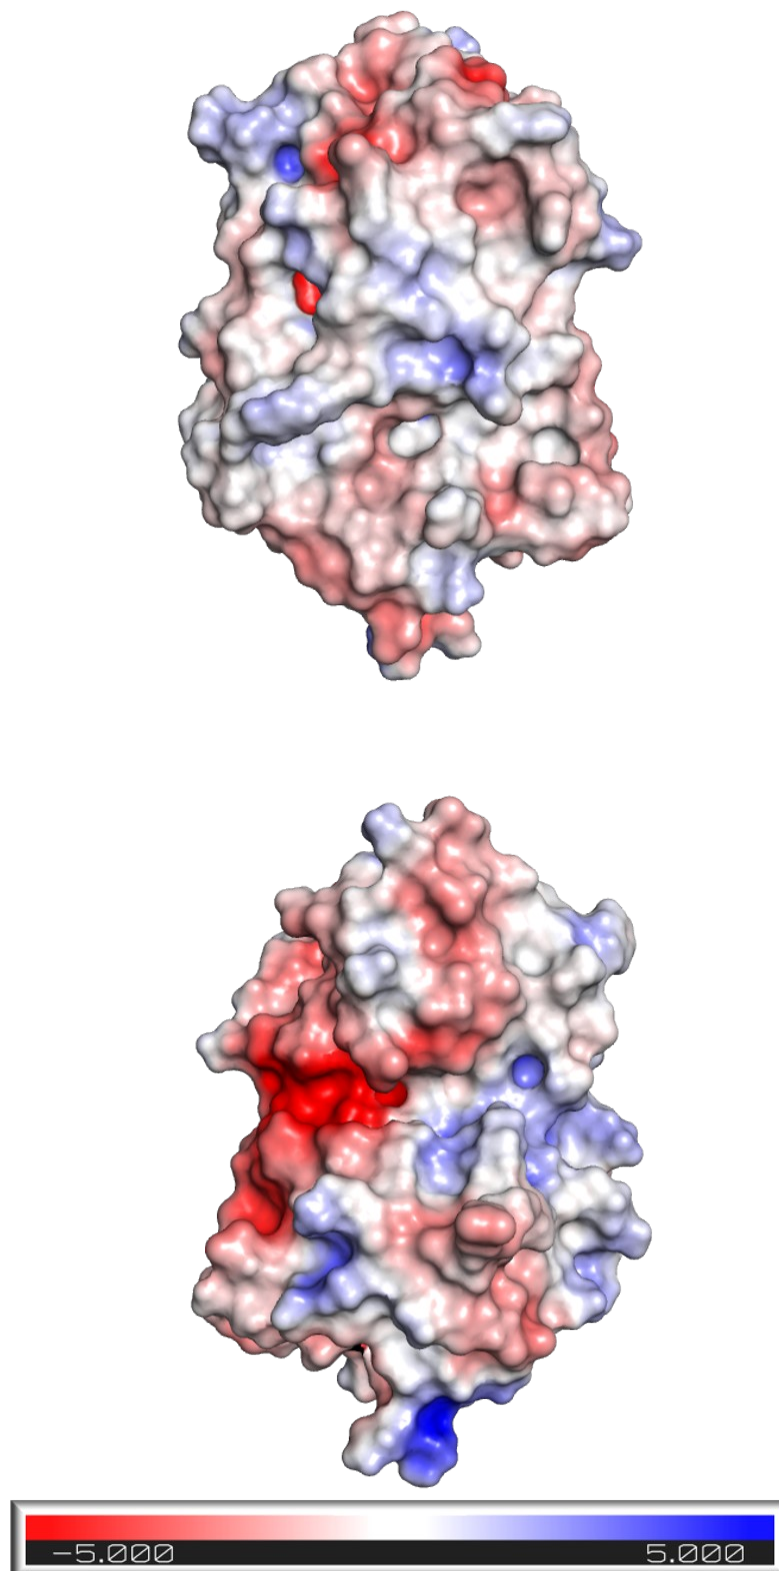

**Supplementary Figure 4: Electrostatic potential of *EcDsbA*.** Electrostatic potential calculated in PyMOL and mapped onto the surface of *EcDsbA* (PDB ID: 1FVK<sup>31</sup>) with a red to blue gradient from -5 to 5. Catalytic face of the protein shown at the top, opposite face (rotated 180°) shown at the bottom.

## Supplementary Figure 5: Comparison of MicroFrag hit properties

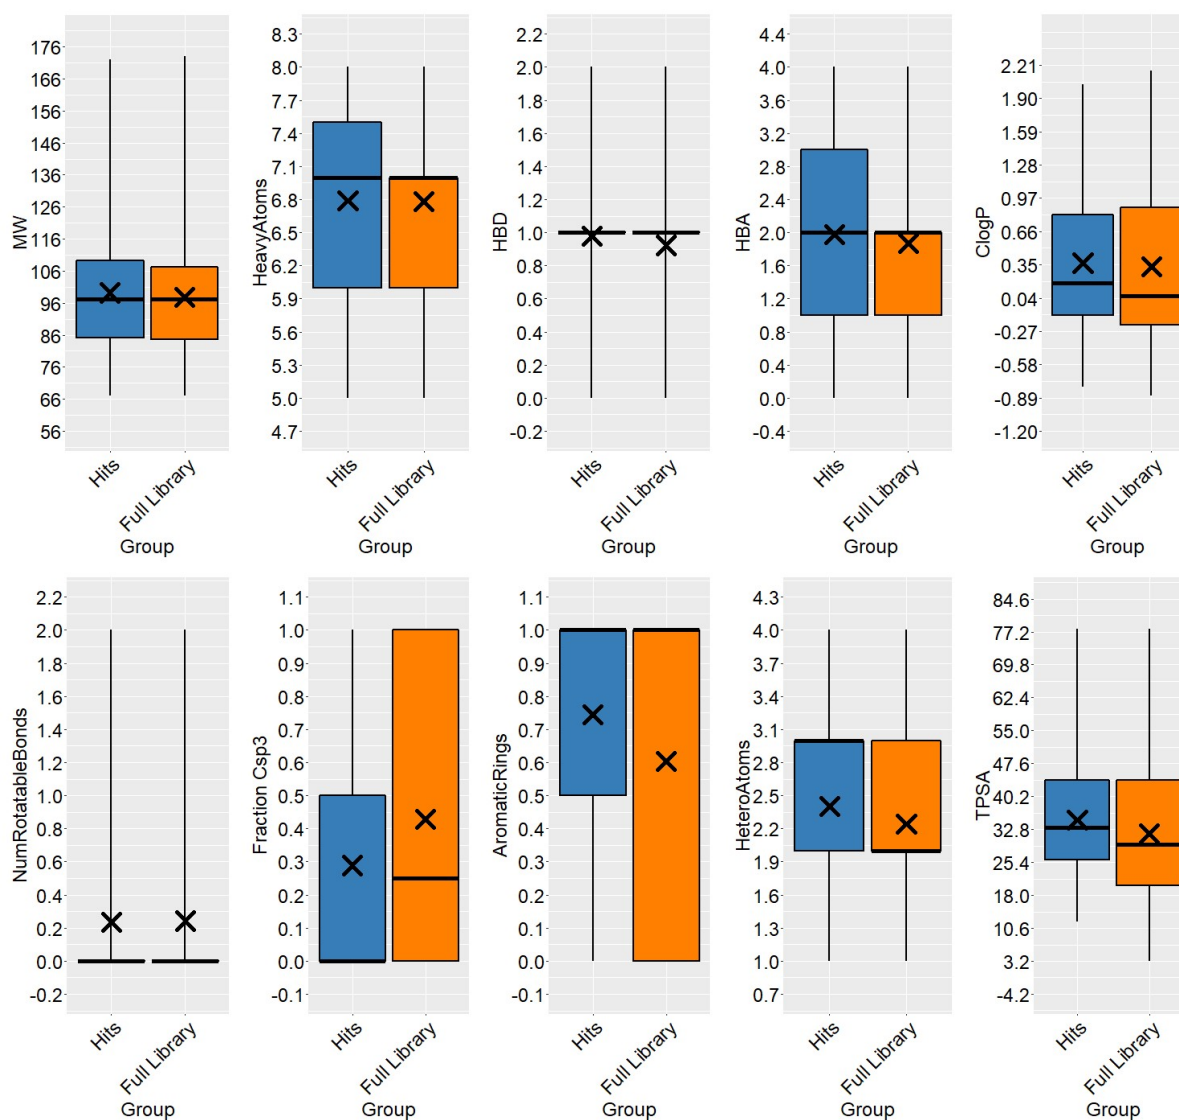

**Supplementary Figure 5: Comparison of properties for MicroFrag hits and the full MicroFrag library.** Box plots show bottom whisker = minimum, bottom box = 25<sup>th</sup> percentile, box bar = median, box top = 75<sup>th</sup> percentile, top whisker = maximum, cross = average. MW = Molecular weight (Da), HBD = Hydrogen bond donors, HBA = Hydrogen bond acceptors, ClogP = Calculated octanol-water partitioning coefficient, TPSA = Total polar surface area (Å<sup>2</sup>).

## Supplementary Figure 6: Structures of validated hit fragments

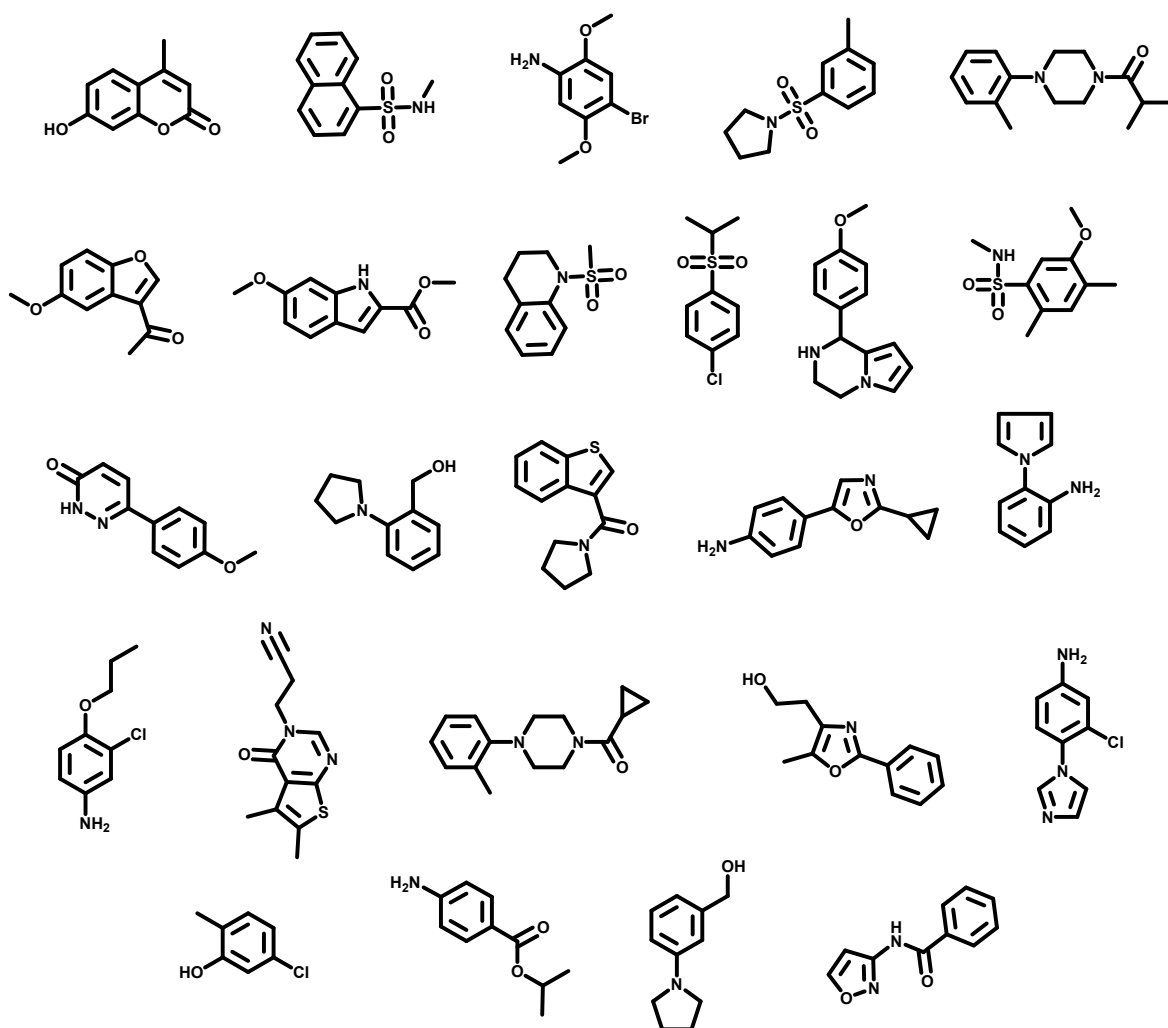

**Supplementary Figure 6.** Validated fragment hits binding to the hydrophobic groove of oxidised *EcDsbA*. Fragments were considered to be validated hits if they induced chemical shift perturbations  $\geq 0.04$  ppm in the  $^{15}\text{N}$ - $^1\text{H}$  HSQC NMR spectrum of *EcDsbA* upon addition of 1 mM compound.

## References

1. M. R. Berthold, N. Cebron, F. Dill, T. R. Gabriel, T. Kötter, T. Meinl, P. Ohl, C. Sieb, K. Thiel and B. Wiswedel, Berlin, Heidelberg, 2008.
2. H. M. Berman, J. Westbrook, Z. Feng, G. Gilliland, T. N. Bhat, H. Weissig, I. N. Shindyalov and P. E. Bourne, *Nucleic Acids Res*, 2000, **28**, 235-242.
3. P. W. Rose, A. Prlić, A. Altunkaya, C. Bi, A. R. Bradley, C. H. Christie, L. D. Costanzo, J. M. Duarte, S. Dutta, Z. Feng, R. K. Green, D. S. Goodsell, B. Hudson, T. Kalro, R. Lowe, E. Peisach, C. Randle, A. S. Rose, C. Shao, Y.-P. Tao, Y. Valasatava, M. Voigt, J. D. Westbrook, J. Woo, H. Yang, J. Y. Young, C. Zardecki, H. M. Berman and S. K. Burley, *Nucleic Acids Research*, 2017, **45**, D271-D281.
4. I. Sushko, E. Salmina, V. A. Potemkin, G. Poda and I. V. Tetko, *Journal of Chemical Information and Modeling*, 2012, **52**, 2310-2316.
5. J. B. Baell and G. A. Holloway, *Journal of Medicinal Chemistry*, 2010, **53**, 2719-2740.
6. J. B. Baell and J. W. M. Nissink, *ACS Chemical Biology*, 2018, **13**, 36-44.
7. D. S. Wishart, Y. D. Feunang, A. C. Guo, E. J. Lo, A. Marcu, J. R. Grant, T. Sajed, D. Johnson, C. Li, Z. Sayeeda, N. Assempour, I. Iynkkaran, Y. Liu, A. Maciejewski, N. Gale, A. Wilson, L. Chin, R. Cummings, D. Le, A. Pon, C. Knox and M. Wilson, *Nucleic Acids Res*, 2018, **46**, D1074-d1082.
8. D. Rogers and M. Hahn, *Journal of Chemical Information and Modeling*, 2010, **50**, 742-754.
9. W. H. B. Sauer and M. K. Schwarz, *Journal of Chemical Information and Computer Sciences*, 2003, **43**, 987-1003.
10. T. K. Allu and T. I. Oprea, *J Chem Inf Model*, 2005, **45**, 1237-1243.
11. G. W. Bemis and M. A. Murcko, *Journal of Medicinal Chemistry*, 1996, **39**, 2887-2893.
12. J. L. Durant, B. A. Leland, D. R. Henry and J. G. Nourse, *Journal of Chemical Information and Computer Sciences*, 2002, **42**, 1273-1280.
13. T. M. McPhillips, S. E. McPhillips, H. J. Chiu, A. E. Cohen, A. M. Deacon, P. J. Ellis, E. Garman, A. Gonzalez, N. K. Sauter, R. P. Phizackerley, S. M. Soltis and P. Kuhn, *J Synchrotron Radiat*, 2002, **9**, 401-406.
14. P. Legrand, *GitHub repository*, 2017, DOI: 10.5281/zenodo.837885.
15. P. R. Evans and G. N. Murshudov, *Acta Crystallogr D Biol Crystallogr*, 2013, **69**, 1204-1214.
16. W. Kabsch, *Acta Crystallogr D Biol Crystallogr*, 2010, **66**, 133-144.
17. T. G. Battye, L. Kontogiannis, O. Johnson, H. R. Powell and A. G. Leslie, *Acta Crystallogr D Biol Crystallogr*, 2011, **67**, 271-281.
18. *Acta Crystallogr D Biol Crystallogr*, 1994, **50**, 760-763.
19. A. J. McCoy, R. W. Grosse-Kunstleve, P. D. Adams, M. D. Winn, L. C. Storoni and R. J. Read, *J Appl Crystallogr*, 2007, **40**, 658-674.
20. K. Inaba, S. Murakami, M. Suzuki, A. Nakagawa, E. Yamashita, K. Okada and K. Ito, *Cell*, 2006, **127**, 789-801.
21. S. Panjikar, V. Parthasarathy, V. S. Lamzin, M. S. Weiss and P. A. Tucker, *Acta Crystallogr D Biol Crystallogr*, 2005, **61**, 449-457.
22. S. Panjikar, V. Parthasarathy, V. S. Lamzin, M. S. Weiss and P. A. Tucker, *Acta crystallographica. Section D, Biological crystallography*, 2009, **65**, 1089-1097.
23. A. Vagin and A. Teplyakov, *Journal of Applied Crystallography*, 1997, **30**, 1022-1025.
24. A. T. Brünger, P. D. Adams, G. M. Clore, W. L. DeLano, P. Gros, R. W. Grosse-Kunstleve, J. S. Jiang, J. Kuszewski, M. Nilges, N. S. Pannu, R. J. Read, L. M. Rice, T. Simonson and G. L. Warren, *Acta Crystallogr D Biol Crystallogr*, 1998, **54**, 905-921.
25. G. N. Murshudov, A. A. Vagin and E. J. Dodson, *Acta Crystallogr D Biol Crystallogr*, 1997, **53**, 240-255.
26. P. Emsley and K. Cowtan, *Acta Crystallogr D Biol Crystallogr*, 2004, **60**, 2126-2132.

27. P. D. Adams, P. V. Afonine, G. Bunkóczi, V. B. Chen, I. W. Davis, N. Echols, J. J. Headd, L. W. Hung, G. J. Kapral, R. W. Grosse-Kunstleve, A. J. McCoy, N. W. Moriarty, R. Oeffner, R. J. Read, D. C. Richardson, J. S. Richardson, T. C. Terwilliger and P. H. Zwart, *Acta Crystallogr D Biol Crystallogr*, 2010, **66**, 213-221.
28. D. Liebschner, P. V. Afonine, M. L. Baker, G. Bunkóczi, V. B. Chen, T. I. Croll, B. Hintze, L. W. Hung, S. Jain, A. J. McCoy, N. W. Moriarty, R. D. Oeffner, B. K. Poon, M. G. Prisant, R. J. Read, J. S. Richardson, D. C. Richardson, M. D. Sammito, O. V. Sobolev, D. H. Stockwell, T. C. Terwilliger, A. G. Urzhumtsev, L. L. Videau, C. J. Williams and P. D. Adams, *Acta Crystallogr D Struct Biol*, 2019, **75**, 861-877.
29. N. W. Moriarty, R. W. Grosse-Kunstleve and P. D. Adams, *Acta Crystallogr. Sect. D. Struct. Biol.*, 2009, **65**, 1074-1080.
30. O. S. Smart, Womack, T. O., Sharff, A., Flensburg, C., Keller, P., and W. Paciorek, Vonrhein, C. and Bricogne, G., Grade, version 1.2.20, (<https://www.globalphasing.com>).
31. L. W. Guddat, J. C. Bardwell, R. Glockshuber, M. Huber-Wunderlich, T. Zander and J. L. Martin, *Protein Sci*, 1997, **6**, 1893-1900.
